# Supplementary material for: Predicting Bone Metastasis Using Gene Expression-Based Machine Learning Models
Source: Front Genet. 2021 Nov 10;12:771092. doi: 10.3389/fgene.2021.771092 (PMC8631472; doi:10.3389/fgene.2021.771092)
Supplement: Supplementary file 2 [file Table1.xlsx]

## Sheet: Sheet1
sample_id	cancer_type	cancer_subtype	metastasis_status	primary_site	metastasis_site	sample_label
TCGA-A2-A04Q-01A	breast cancer	breast invasive carcinoma	NO	breast		Primary Tumor
TCGA-A2-A04R-01A	breast cancer	breast invasive carcinoma	NO	breast		Primary Tumor
TCGA-A2-A04T-01A	breast cancer	breast invasive carcinoma	NO	breast		Primary Tumor
TCGA-A2-A04U-01A	breast cancer	breast invasive carcinoma	NO	breast		Primary Tumor
TCGA-A2-A04V-01A	breast cancer	breast invasive carcinoma	NO	breast		Primary Tumor
TCGA-A2-A04W-01A	breast cancer	breast invasive carcinoma	NO	breast		Primary Tumor
TCGA-A2-A04X-01A	breast cancer	breast invasive carcinoma	NO	breast		Primary Tumor
TCGA-A2-A04Y-01A	breast cancer	breast invasive carcinoma	NO	breast		Primary Tumor
TCGA-A2-A0CK-01A	breast cancer	breast invasive carcinoma	NO	breast		Primary Tumor
TCGA-A2-A0CL-01A	breast cancer	breast invasive carcinoma	NO	breast		Primary Tumor
TCGA-A2-A0CM-01A	breast cancer	breast invasive carcinoma	NO	breast		Primary Tumor
TCGA-A2-A0CM-01A	breast cancer	breast invasive carcinoma	NO	breast		Primary Tumor
TCGA-A2-A0CO-01A	breast cancer	breast invasive carcinoma	NO	breast		Primary Tumor
TCGA-A2-A0CP-01A	breast cancer	breast invasive carcinoma	NO	breast		Primary Tumor
TCGA-A2-A0CQ-01A	breast cancer	breast invasive carcinoma	NO	breast		Primary Tumor
TCGA-A2-A0CR-01A	breast cancer	breast invasive carcinoma	NO	breast		Primary Tumor
TCGA-A2-A0CS-01A	breast cancer	breast invasive carcinoma	NO	breast		Primary Tumor
TCGA-A2-A0CT-01A	breast cancer	breast invasive carcinoma	NO	breast		Primary Tumor
TCGA-A2-A0CU-01A	breast cancer	breast invasive carcinoma	NO	breast		Primary Tumor
TCGA-A2-A0CV-01A	breast cancer	breast invasive carcinoma	NO	breast		Primary Tumor
TCGA-A2-A0CW-01A	breast cancer	breast invasive carcinoma	NO	breast		Primary Tumor
TCGA-A2-A0CY-01A	breast cancer	breast invasive carcinoma	NO	breast		Primary Tumor
TCGA-A2-A0CZ-01A	breast cancer	breast invasive carcinoma	NO	breast		Primary Tumor
TCGA-A2-A0D0-01A	breast cancer	breast invasive carcinoma	NO	breast		Primary Tumor
TCGA-A2-A0D1-01A	breast cancer	breast invasive carcinoma	NO	breast		Primary Tumor
TCGA-A2-A0D2-01A	breast cancer	breast invasive carcinoma	NO	breast		Primary Tumor
TCGA-A2-A0D3-01A	breast cancer	breast invasive carcinoma	NO	breast		Primary Tumor
TCGA-A2-A0D4-01A	breast cancer	breast invasive carcinoma	NO	breast		Primary Tumor
TCGA-A2-A0EM-01A	breast cancer	breast invasive carcinoma	NO	breast		Primary Tumor
TCGA-A2-A0EN-01A	breast cancer	breast invasive carcinoma	NO	breast		Primary Tumor
TCGA-A2-A0EO-01A	breast cancer	breast invasive carcinoma	NO	breast		Primary Tumor
TCGA-A2-A0EP-01A	breast cancer	breast invasive carcinoma	NO	breast		Primary Tumor
TCGA-A2-A0EQ-01A	breast cancer	breast invasive carcinoma	NO	breast		Primary Tumor
TCGA-A2-A0ER-01A	breast cancer	breast invasive carcinoma	NO	breast		Primary Tumor
TCGA-A2-A0ES-01A	breast cancer	breast invasive carcinoma	NO	breast		Primary Tumor
TCGA-A2-A0ET-01A	breast cancer	breast invasive carcinoma	NO	breast		Primary Tumor
TCGA-A2-A0EU-01A	breast cancer	breast invasive carcinoma	NO	breast		Primary Tumor
TCGA-A2-A0EV-01A	breast cancer	breast invasive carcinoma	NO	breast		Primary Tumor
TCGA-A2-A0EW-01A	breast cancer	breast invasive carcinoma	NO	breast		Primary Tumor
TCGA-A2-A0EX-01A	breast cancer	breast invasive carcinoma	NO	breast		Primary Tumor
TCGA-A2-A0EY-01A	breast cancer	breast invasive carcinoma	NO	breast		Primary Tumor
TCGA-A2-A0ST-01A	breast cancer	breast invasive carcinoma	NO	breast		Primary Tumor
TCGA-A2-A0SU-01A	breast cancer	breast invasive carcinoma	NO	breast		Primary Tumor
TCGA-A2-A0SV-01A	breast cancer	breast invasive carcinoma	NO	breast		Primary Tumor
TCGA-A2-A0SW-01A	breast cancer	breast invasive carcinoma	NO	breast		Primary Tumor
TCGA-2A-AAYU-01A	prostate cancer	prostate adenocarcinoma	NO	prostate		Primary Tumor
TCGA-4L-AA1F-01A	prostate cancer	prostate adenocarcinoma	NO	prostate		Primary Tumor
TCGA-CH-5737-01A	prostate cancer	prostate adenocarcinoma	NO	prostate		Primary Tumor
TCGA-CH-5738-01A	prostate cancer	prostate adenocarcinoma	NO	prostate		Primary Tumor
TCGA-CH-5739-01A	prostate cancer	prostate adenocarcinoma	NO	prostate		Primary Tumor
TCGA-CH-5740-01A	prostate cancer	prostate adenocarcinoma	NO	prostate		Primary Tumor
TCGA-CH-5741-01A	prostate cancer	prostate adenocarcinoma	NO	prostate		Primary Tumor
TCGA-CH-5743-01A	prostate cancer	prostate adenocarcinoma	NO	prostate		Primary Tumor
TCGA-CH-5744-01A	prostate cancer	prostate adenocarcinoma	NO	prostate		Primary Tumor
TCGA-CH-5745-01A	prostate cancer	prostate adenocarcinoma	NO	prostate		Primary Tumor
TCGA-CH-5746-01A	prostate cancer	prostate adenocarcinoma	NO	prostate		Primary Tumor
TCGA-CH-5748-01A	prostate cancer	prostate adenocarcinoma	NO	prostate		Primary Tumor
TCGA-CH-5750-01A	prostate cancer	prostate adenocarcinoma	NO	prostate		Primary Tumor
TCGA-CH-5752-01A	prostate cancer	prostate adenocarcinoma	NO	prostate		Primary Tumor
TCGA-CH-5753-01A	prostate cancer	prostate adenocarcinoma	NO	prostate		Primary Tumor
TCGA-CH-5754-01A	prostate cancer	prostate adenocarcinoma	NO	prostate		Primary Tumor
TCGA-CH-5761-01A	prostate cancer	prostate adenocarcinoma	NO	prostate		Primary Tumor
TCGA-CH-5762-01A	prostate cancer	prostate adenocarcinoma	NO	prostate		Primary Tumor
TCGA-CH-5763-01A	prostate cancer	prostate adenocarcinoma	NO	prostate		Primary Tumor
TCGA-CH-5764-01A	prostate cancer	prostate adenocarcinoma	NO	prostate		Primary Tumor
TCGA-CH-5765-01A	prostate cancer	prostate adenocarcinoma	NO	prostate		Primary Tumor
TCGA-CH-5766-01A	prostate cancer	prostate adenocarcinoma	NO	prostate		Primary Tumor
TCGA-CH-5767-01A	prostate cancer	prostate adenocarcinoma	NO	prostate		Primary Tumor
TCGA-CH-5768-01A	prostate cancer	prostate adenocarcinoma	NO	prostate		Primary Tumor
TCGA-CH-5769-01A	prostate cancer	prostate adenocarcinoma	NO	prostate		Primary Tumor
TCGA-CH-5771-01A	prostate cancer	prostate adenocarcinoma	NO	prostate		Primary Tumor
TCGA-CH-5772-01A	prostate cancer	prostate adenocarcinoma	NO	prostate		Primary Tumor
TCGA-CH-5788-01A	prostate cancer	prostate adenocarcinoma	NO	prostate		Primary Tumor
TCGA-CH-5789-01A	prostate cancer	prostate adenocarcinoma	NO	prostate		Primary Tumor
TCGA-CH-5790-01A	prostate cancer	prostate adenocarcinoma	NO	prostate		Primary Tumor
TCGA-CH-5791-01A	prostate cancer	prostate adenocarcinoma	NO	prostate		Primary Tumor
TCGA-CH-5792-01A	prostate cancer	prostate adenocarcinoma	NO	prostate		Primary Tumor
TCGA-CH-5794-01A	prostate cancer	prostate adenocarcinoma	NO	prostate		Primary Tumor
TCGA-EJ-5494-01A	prostate cancer	prostate adenocarcinoma	NO	prostate		Primary Tumor
TCGA-A2-A3XU-01A	breast cancer	breast invasive carcinoma	YES	breast	bone	Primary Tumor
TCGA-AC-A2FE-01A	breast cancer	breast invasive carcinoma	YES	breast	bone	Primary Tumor
TCGA-B6-A3ZX-01A	breast cancer	breast invasive carcinoma	YES	breast	bone	Primary Tumor
TCGA-3C-AAAU-01A	breast cancer	breast invasive carcinoma	YES	breast	bone	Primary Tumor
TCGA-3C-AALI-01A	breast cancer	breast invasive carcinoma	YES	breast	bone	Primary Tumor
TCGA-3C-AALJ-01A	breast cancer	breast invasive carcinoma	YES	breast	bone	Primary Tumor
TCGA-3C-AALK-01A	breast cancer	breast invasive carcinoma	YES	breast	bone	Primary Tumor
TCGA-4H-AAAK-01A	breast cancer	breast invasive carcinoma	YES	breast	bone	Primary Tumor
TCGA-5L-AAT0-01A	breast cancer	breast invasive carcinoma	YES	breast	bone	Primary Tumor
TCGA-5L-AAT1-01A	breast cancer	breast invasive carcinoma	YES	breast	bone	Primary Tumor
TCGA-5T-A9QA-01A	breast cancer	breast invasive carcinoma	YES	breast	bone	Primary Tumor
TCGA-A1-A0SB-01A	breast cancer	breast invasive carcinoma	YES	breast	bone	Primary Tumor
TCGA-A1-A0SD-01A	breast cancer	breast invasive carcinoma	YES	breast	bone	Primary Tumor
TCGA-A1-A0SE-01A	breast cancer	breast invasive carcinoma	YES	breast	bone	Primary Tumor
TCGA-A1-A0SF-01A	breast cancer	breast invasive carcinoma	YES	breast	bone	Primary Tumor
TCGA-A1-A0SG-01A	breast cancer	breast invasive carcinoma	YES	breast	bone	Primary Tumor
TCGA-A1-A0SH-01A	breast cancer	breast invasive carcinoma	YES	breast	bone	Primary Tumor
TCGA-A1-A0SI-01A	breast cancer	breast invasive carcinoma	YES	breast	bone	Primary Tumor
TCGA-A1-A0SJ-01A	breast cancer	breast invasive carcinoma	YES	breast	bone	Primary Tumor
TCGA-A1-A0SK-01A	breast cancer	breast invasive carcinoma	YES	breast	bone	Primary Tumor
TCGA-A1-A0SM-01A	breast cancer	breast invasive carcinoma	YES	breast	bone	Primary Tumor
TCGA-A1-A0SN-01A	breast cancer	breast invasive carcinoma	YES	breast	bone	Primary Tumor
TCGA-A1-A0SO-01A	breast cancer	breast invasive carcinoma	YES	breast	bone	Primary Tumor
TCGA-A1-A0SP-01A	breast cancer	breast invasive carcinoma	YES	breast	bone	Primary Tumor
TCGA-A1-A0SQ-01A	breast cancer	breast invasive carcinoma	YES	breast	bone	Primary Tumor
TCGA-A2-A04N-01A	breast cancer	breast invasive carcinoma	YES	breast	bone	Primary Tumor
TCGA-A2-A04P-01A	breast cancer	breast invasive carcinoma	YES	breast	bone	Primary Tumor
TCGA-G9-A9S0-01A	prostate cancer	prostate adenocarcinoma	YES	prostate	bone	Primary Tumor
TCGA-KK-A8I4-01A	prostate cancer	prostate adenocarcinoma	YES	prostate	bone	Primary Tumor
TCGA-2A-A8VL-01A	prostate cancer	prostate adenocarcinoma	YES	prostate	bone	Primary Tumor
TCGA-2A-A8VO-01A	prostate cancer	prostate adenocarcinoma	YES	prostate	bone	Primary Tumor
TCGA-2A-A8VT-01A	prostate cancer	prostate adenocarcinoma	YES	prostate	bone	Primary Tumor
TCGA-2A-A8VV-01A	prostate cancer	prostate adenocarcinoma	YES	prostate	bone	Primary Tumor
TCGA-2A-A8VX-01A	prostate cancer	prostate adenocarcinoma	YES	prostate	bone	Primary Tumor
TCGA-2A-A8W1-01A	prostate cancer	prostate adenocarcinoma	YES	prostate	bone	Primary Tumor
TCGA-2A-A8W3-01A	prostate cancer	prostate adenocarcinoma	YES	prostate	bone	Primary Tumor
TCGA-2A-AAYF-01A	prostate cancer	prostate adenocarcinoma	YES	prostate	bone	Primary Tumor
TCGA-2A-AAYO-01A	prostate cancer	prostate adenocarcinoma	YES	prostate	bone	Primary Tumor
